# Supplementary material for: Analysis of the Genetic Diversity and Population Structure of Austrian and Belgian Wheat Germplasm within a Regional Context Based on DArT Markers
Source: PubMed Central journal article supplement (PMC5793198; doi:10.3390/genes9010047), 2018-01-22
Supplement: genes-09-00047-s001.pdf [file genes-09-00047-s001.pdf]

**Table S1. List of Austrian and Belgian accessions analyzed in this study.**

| <b>No.</b> | <b>CGN Number</b> | <b>Accession name</b>     | <b>Origin</b> |
|------------|-------------------|---------------------------|---------------|
| 1          | CGN08888          | Admonter Fruehweizen      | Austria       |
| 2          | CGN14895          | Allgauer Landweizen       | Austria       |
| 3          | CGN14842          | Alpiner Bartweizen 1      | Austria       |
| 4          | CGN14843          | Alpiner Bartweizen 2      | Austria       |
| 5          | CGN14844          | Alpiner Bartweizen 3      | Austria       |
| 6          | CGN14845          | Alpiner Bartweizen 4      | Austria       |
| 7          | CGN14903          | Altsteier Weizen 1        | Austria       |
| 8          | CGN14904          | Altsteier Weizen 2        | Austria       |
| 9          | CGN14905          | Altsteier Weizen 3        | Austria       |
| 10         | CGN14906          | Altsteier Weizen 4        | Austria       |
| 11         | CGN08889          | Angener Frueher           | Austria       |
| 12         | CGN04281          | Attergauer Bartweizen 1   | Austria       |
| 13         | CGN04282          | Attergauer Bartweizen 2   | Austria       |
| 14         | CGN05364          | Attergauer Bartweizen 3   | Austria       |
| 15         | CGN04479          | Atut                      | Austria       |
| 16         | CGN09021          | Aurora                    | Austria       |
| 17         | CGN08890          | Austro Bankut             | Austria       |
| 18         | CGN05374          | Bartweizen 1              | Austria       |
| 19         | CGN05375          | Bartweizen 2              | Austria       |
| 20         | CGN14780          | Bayernkonig               | Austria       |
| 21         | CGN04293          | Bergmannsweizen 1         | Austria       |
| 22         | CGN05378          | Bergmannsweizen 2         | Austria       |
| 23         | CGN08891          | Boehmischer Wechselweizen | Austria       |
| 24         | CGN14900          | Breisgauer Landweizen     | Austria       |
| 25         | CGN12155          | Burgweizen                | Austria       |
| 26         | CGN08918          | Extrem                    | Austria       |
| 27         | CGN05448          | Feldsberger Grannen       | Austria       |
| 28         | CGN05468          | Gratweizen                | Austria       |
| 29         | CGN08914          | Harrachweizen             | Austria       |
| 30         | CGN05481          | Haunsbergweizen 1         | Austria       |
| 31         | CGN04355          | Haunsbergweizen 2         | Austria       |
| 32         | CGN05482          | Haunsbergweizen 3         | Austria       |
| 33         | CGN08892          | Hohenauer Kolbenweizen    | Austria       |
| 34         | CGN08893          | Immerdorfer Kolben        | Austria       |
| 35         | CGN04363          | Innviertler Bartweizen    | Austria       |
| 36         | CGN05507          | Kadolzer 1                | Austria       |
| 37         | CGN05508          | Kadolzer 2                | Austria       |
| 38         | CGN08897          | Kornenburger              | Austria       |
| 39         | CGN08896          | Kornerburger grannen      | Austria       |
| 40         | CGN14902          | Lambrechtshausen          | Austria       |
| 41         | CGN14894          | Langs Taublinger Braun    | Austria       |
| 42         | CGN08898          | Lassers Dickkopf          | Austria       |
| 43         | CGN14785          | Linie 10/a                | Austria       |
| 44         | CGN14786          | Linie 10/b                | Austria       |
| 45         | CGN14850          | Linie 103/a               | Austria       |
| 46         | CGN14851          | Linie 103/b               | Austria       |
| 47         | CGN14860          | Linie 116/a               | Austria       |
| 48         | CGN14861          | Linie 116/b               | Austria       |

|    |          |                          |         |
|----|----------|--------------------------|---------|
| 49 | CGN14862 | Linie 117/a              | Austria |
| 50 | CGN14863 | Linie 117/b              | Austria |
| 51 | CGN08899 | Loosdorfer Bart          | Austria |
| 52 | CGN04307 | Maria Neustift           | Austria |
| 53 | CGN14787 | Marienhofer Kolben       | Austria |
| 54 | CGN08919 | Multiweiss               | Austria |
| 55 | CGN14893 | Niederbayer Landweizen   | Austria |
| 56 | CGN04406 | Niederdorf               | Austria |
| 57 | CGN05604 | Nuziders                 | Austria |
| 58 | CGN14897 | Obermenzinger Landweizen | Austria |
| 59 | CGN14899 | Oberosterr. Landweizen   | Austria |
| 60 | CGN14846 | Otterbacher              | Austria |
| 61 | CGN16137 | Pobstdorfer Extrem       | Austria |
| 62 | CGN08904 | Probstdorfer Kolben      | Austria |
| 63 | CGN08913 | Reichersberger 1081      | Austria |
| 64 | CGN08905 | Reichersberger St. 39    | Austria |
| 65 | CGN08906 | Reichersberger St. 42    | Austria |
| 66 | CGN08915 | Reichersberger Triumph   | Austria |
| 67 | CGN04429 | Ritzlhofer Alt           | Austria |
| 68 | CGN14901 | Ritzlhofer Neu           | Austria |
| 69 | CGN05677 | Sipbachzeller            | Austria |
| 70 | CGN08619 | Stabil                   | Austria |
| 71 | CGN08049 | Alba                     | Belgium |
| 72 | CGN08052 | Alter                    | Belgium |
| 73 | CGN08070 | Anouska                  | Belgium |
| 74 | CGN08059 | Ble Blanc de Flandre 1   | Belgium |
| 75 | CGN05387 | Ble Blanc de Flandre 2   | Belgium |
| 76 | CGN08060 | Bledor                   | Belgium |
| 77 | CGN12156 | Cama 1                   | Belgium |
| 78 | CGN08069 | Cama 2                   | Belgium |
| 79 | CGN08054 | Dir. Journee             | Belgium |
| 80 | CGN05458 | Froment de Polders       | Belgium |
| 81 | CGN08066 | Hesbignon                | Belgium |
| 82 | CGN08050 | Jubile                   | Belgium |
| 83 | CGN08061 | Leda                     | Belgium |
| 84 | CGN12205 | Marchal                  | Belgium |
| 85 | CGN08062 | Minister                 | Belgium |
| 86 | CGN08068 | Norda                    | Belgium |
| 87 | CGN08063 | Panter 1                 | Belgium |
| 88 | CGN16048 | Panter 2                 | Belgium |
| 89 | CGN08055 | Prima                    | Belgium |
| 90 | CGN08053 | P. Delos                 | Belgium |
| 91 | CGN08067 | P. Marchal               | Belgium |
| 92 | CGN08064 | Rustique                 | Belgium |
| 93 | CGN08065 | Stella                   | Belgium |
| 94 | CGN12254 | Val                      | Belgium |
| 95 | CGN08051 | Zanda                    | Belgium |
